# Supplementary material
Source: PubMed Central journal article supplement (PMC6731658)
Supplement: pnas.1905149116.sapp.pdf [file pnas.1905149116.sapp.pdf]

## Supplementary Information for

A high-throughput system to identify inhibitors of *Candidatus Liberibacter asiaticus* transcription regulators.

Melanie J. Barnett<sup>1</sup>, David E. Solow-Cordero<sup>2</sup> and Sharon R. Long<sup>1</sup>

<sup>1</sup>Department of Biology, Stanford University, Stanford, California, USA

<sup>2</sup>High-Throughput Bioscience Center, Stanford University, Stanford, California, USA

Corresponding author: Sharon R. Long  
Email: srl@stanford.edu

### **This PDF file includes:**

Supplementary text for Materials and Methods  
Figs. S1 to S5  
Tables S1 to S7  
References for SI reference citations

### **Other supplementary materials for this manuscript include the following:**

Datasets S1 to S3

## Supplementary Information Text

### Materials and Methods

**Prediction of *Ca. Liberibacter asiaticus* (CLas) transcription regulators.** Published CLas genome annotations (1, 2) were mined for proteins annotated as transcription regulators. To identify additional transcription regulators, we performed BLASTp sequence alignment analyses. To identify CLas and *Sme* orthologous transcriptional regulators, we performed bidirectional BLASTp analysis of the CLas Psy62 and *S. meliloti* (*Sme*) proteomes.

**Strains and plasmids.** All *Sme* strains (Table S2) used in this study are derived from CL150, the sequenced Rm1021 strain (3) with repaired *pstC* and *ecfR1* genes (4). *Sme* strains were grown in M9 sucrose (supplemented with 500 ng/mL biotin and 50 ng/mL CoCl<sub>2</sub>•6H<sub>2</sub>O), LB (Luria Broth, 5 g/L NaCl) or TY medium at 30°C, as described (5). *E. coli* strains were grown in LB medium at 37°C. Antibiotics were used at the following concentrations: ampicillin (Ap), 50-100 µg mL<sup>-1</sup>; chloramphenicol (Cm), 50 µg mL<sup>-1</sup>; gentamicin (Gm), 5 µg mL<sup>-1</sup> for *E. coli* and 50 µg mL<sup>-1</sup> for *Sme*; and streptomycin (Sm), 500 µg mL<sup>-1</sup>.

Standard techniques were used for cloning and PCR amplification. Oligonucleotide primers used in this study are listed in Table S7. *E. coli* strains DH5α and NEB5α (New England Biolabs; Ipswich, MA) were used as plasmid hosts. Triparental conjugations were conducted as described (5) to transfer plasmids (Table S2) from *E. coli* to *Sme*.

Regulator genes (Table 1) were cloned into the medium copy, Isopropyl β-D-1-thiogalactopyranoside (IPTG)-inducible vector, pSRKGm (6) as NdeI-KpnI DNA fragments. pSRKGm contains a *lacI-lac* promoter-operator complex and a *lacZ* ribosome binding site (RBS) sequence 6 nt upstream of the NdeI-site-ATG codon (AGGAAACAGCATATG). The *Ca. L. asiaticus* (CLas) genome is GC-poor (37%), while the *Sme* genome is GC-rich (67%) (3); therefore, we fully optimized the coding sequence of each *Ca. L. asiaticus* Psy62 (1) regulator for expression in *Sme* with the JCat Codon Adaptation Tool to a codon adaptation index of 1 compared to their pre-optimization values that ranged from 0.11 to 0.15 (7; <http://www.jcat.de>). We also used JCat options to remove internal Rho-independent terminators and RBSs from the regulator coding sequences. The CLas DNAs were synthesized by GeneArt Gene Synthesis service (Invitrogen, ThermoScientific), and their nucleotide sequences have been deposited in NCBI (GenBank accession numbers: MK359043-MK359048). Since *visN* and *visR* form an operon in *Sme*, optimized CLas *visN* and *visR* were synthesized as a single DNA and separated by the *Sme* 11-nt *visN-visR* intergenic sequence. *Sme ctrA*, *ldtR*, *rpoH1* and *visNR* coding sequences were each cloned into pSRKGm without changes to their DNA sequences. Genes cloned into pSRKGm were expressed by inducing with 0.5 mM IPTG.

Unmarked deletions of *Sme ctrA* (SMc00654), *ldtR* (SMc01768), *lsrB* (SMc01225), *phrR1* (SMc01110), *phrR2* (SMb21117), and the *visN-visR* operon (SMc03016-SMc03015), were constructed using the *sacB* vector, pJQ200 (8), and sucrose counterselection, as described previously (5), except that an antibiotic resistance cassette was not inserted. Construction of *ctrA*-deleted *Sme* was more complicated because CtrA is essential for viability in *Sme* and most other  $\alpha$ -proteobacteria (9). A deletion of *Sme ctrA* was viable if *Sme ctrA* was carried in *trans* on pSRKGm (pMB913), and its expression induced with 0.5 mM IPTG. We failed to obtain a deletion when optimized CLas *ctrA* was similarly expressed (pMB876). Further tests with pMB913 and pMB876 in WT CL150, which retains a functional *ctrA* gene, revealed that expression of CLas *ctrA* conferred lethality on LB agar plates containing IPTG 0.2, 0.3, 0.4, 0.5 or 1 mM IPTG. Expression of *Sme ctrA* using these IPTG concentrations had no effect on viability. Since CL150 pMB876 was viable on LB with 0.1 mM IPTG and on M9 sucrose or M9 glycerol plates with 0.5 mM IPTG, we tried to obtain a *Sme* strain deleted for *ctrA* using these media with CLas *ctrA* in *trans*, but failed, suggesting that CLas *ctrA* cannot substitute for *Sme ctrA*.

We designed a modular enhanced green fluorescent protein (EGFP) expression cassette to clone into the KpnI-NheI sites of pSRKGm (Fig. S2). This cassette includes an EGFP coding sequence partially optimized for expression in *Sme*, a spacer sequence upstream of EGFP that can be replaced by promoter DNA, and flanking transcription terminators (Fig. S2). The core cassette feature is a GFP coding sequence with F64L and S65T enhancements, optimized for expression in *Sme* using Optimizer (10; <http://genomes.urv.es/OPTIMIZER/>) and manual editing. Two nucleotides in the EGFP coding region were changed to disrupt promoter-like sequences: 153 (T>C) and 432 (T>C). The final EGFP sequence has a *Sme* codon adaptation index of 0.80. Upstream of the EGFP ORF ATG is an optimal *Sme* RBS (GGAGGCTCTTCAATG; 11), and a synthetic transcriptionally silent spacer, S1.2 (12), which can be excised with SpeI-XhoI and replaced by a promoter DNA sequence. A different transcriptionally silent random spacer, S1.1 (12), was inserted downstream of the KpnI site to create space between the bidirectional transcription terminator region (*rpoC* and *rnpB*) (12), and the upstream regulator gene. Two additional transcription terminators are located upstream of the promoter cloning site (M13 central T linker + *rrnD* terminator 1 and *rrnB* terminator 1) (12) to prevent extraneous expression of EGFP. The intrinsic terminator search tool ARNold (13, 14); <http://rna.igmors.u-psud.fr/toolbox/arnold/>) found only the four terminators used to construct the cassette. Synthesized by GeneArt Gene Synthesis service (Invitrogen), the cassette nucleotide sequence has been deposited in NCBI (Accession number MK387175). In the course of this work, pSRKGm plasmids containing the EGFP cassette with each CLas regulator gene, and candidate promoter sequences upstream of EGFP were constructed (Table S2).

Based on Affymetrix Gene Chip results for *Sme* strains ectopically expressing CLas regulators, candidate target promoters were amplified and cloned upstream of the EGFP cassette as SpeI-XhoI DNA fragments (Table S7). We focused primarily on genes showing a large increase in transcript

abundance in the CLas regulator strain compared to its control. We also considered other factors: consistency among three biological replicates in each Affymetrix GeneChip experiment; accuracy of the corresponding gene annotation; expression behavior of other genes in the operon (when applicable); availability of transcription and translation start site data (4); whether a given promoter was activated by the orthologous *Sme* regulator; and feasibility of cloning the promoter without including portions of nearby ORFs or overlapping promoters. Strains were tested for inducible fluorescence by streaking on agar plates  $\pm$  0.5 mM IPTG and imaging under blue epifluorescence, and by fluorometric assays of liquid cultures (emission=484 nm; excitation=507 nm). Promoter-EGFP plasmids are listed in Table S2 and include the following regulator (target promoter) pairs: CtrA (*PminC*); LdtR (*Ptac*, *Psmc04059*, *PldtP*); LsrB (*Plrp3*, *Psmc01834*); PhrR (*PldtR*, *Psmc00404*); RpoH (*PibpA*, *PgroES5*); and VisNR (*Prem*). With the exception of *tacA*, all promoters with strong increased expression in the Affymetrix GeneChip experiments showed enhanced EGFP fluorescence when expression of the regulator was induced with IPTG (*ibpA*, *groES5*, *rem*, *smc04059*). The lack of strong fluorescence with the *tacA* construct may be due to our inability to correctly identify the *tacA* promoter. CLas regulators that acted weakly at *Sme* target promoters, as shown by transcriptome analyses (e.g. CtrA, LsrB, PhrR), failed to significantly enhance EGFP fluorescence when their expression was induced with IPTG.

**Phenotypic assays.** Growth under heat stress was assayed on LB agar plates at the 37°C restrictive temperature. Swimming motility and deoxycholate sensitivity were assayed as previously described (15). Morphologies of cells ectopically expressing *Sme* LdtR (MB1101 pMB961) and optimized CLas LdtR (MB1101 pMB878) were examined using a Leica DM5000B microscope, with MB1101 pSRKGm as a control. Cells were grown in M9 sucrose medium with Gm, Sm, and 0.5 mM IPTG for 19 hours before imaging.

**Affymetrix GeneChip analysis.** For transcriptome analysis of *Sme*, we used a custom dual genome Affymetrix Symbiosis Chip (16). Each optimized CLas regulator was ectopically expressed as described above. Controls for comparison were *Sme* deletion strains carrying the empty pSRKGm plasmid (or in the case of CtrA, CL150 carrying pSRKGm). Three biological replicates were analyzed for each strain. For additional controls, in two instances (RpoH1 and CtrA) we also tested deletion strain behavior when the native *Sme* regulator gene was expressed from pSRKGm (Table S2). Overnight starter cultures were inoculated from single colonies in M9 sucrose medium with 50  $\mu\text{g mL}^{-1}$  Gm and 500  $\mu\text{g mL}^{-1}$  Sm. The  $\Delta rpoH1rpoH2$  strain (RFF231) grows poorly when inoculated from single colonies into M9 sucrose medium, so these strains were grown overnight from a single colony in LB medium, then washed and the cells were resuspended in fresh M9 sucrose medium before inoculating the flask culture. For RNA purification, starter cultures were diluted to  $\sim$ 0.1 OD<sub>600</sub> in 20 mL M9 sucrose medium at 50  $\mu\text{g mL}^{-1}$  Gm and 500  $\mu\text{g mL}^{-1}$  Sm, in 250 mL baffled flasks. Cultures were allowed to grow to mid-exponential phase ( $\sim$ 0.5 to  $\sim$ 0.7 OD<sub>600</sub>), with shaking (250 rpm) at 30°C. Replicates from a single experiment were grown to within  $\sim$ 0.1 OD<sub>600</sub> units of each other. At mid-exponential phase, IPTG was added to a final

concentration of 0.5 mM and the cells were grown for one hour before harvest. All strains, including empty vector control strains, were induced with IPTG to account for effects of IPTG on global transcription. Cell harvest, RNA purification, cDNA synthesis and labeling, hybridization and scanning were performed as previously described (16), except for the  $\Delta phrR1R2$  strain, which we discovered was resistant to lysozyme lysis. After troubleshooting, we obtained sufficient RNA amounts from the  $\Delta phrR1R2$  strain by washing the cells with 1% Triton X-100 detergent before treatment with an enhanced activity lysozyme (Ready-Lyse, Epicentre Inc.). IPTG-induced expression of CLas PhrR in *Sme*  $\Delta phrR1phrR2$  did not suppress its lysozyme-resistant phenotype and resulted in even poorer growth, suggesting that CLas *phrR* cannot substitute for *Sme phrR1* and that ectopic expression of CLas PhrR is deleterious to *Sme* growth.

Data were analyzed with Partek Genomics Suite 6.6 software with the following settings: RMA for background correction; quantile normalization; log base 2 transformation; median polish summarization; and ANOVA (with LS means used to calculate fold change, P-value  $\leq 0.05$ ) for identification of differentially expressed genes. For experiments where *Sme* regulators were also tested (RpoH, CtrA), each pairwise comparison of the regulator strain to the pSRKGm control was performed separately. The Affymetrix GeneChip data have been deposited under Superseries accession number GSE124984 in the Gene Expression Omnibus (GEO) database.

**High-throughput screening of compound libraries.** Screening of strains carrying a CLas regulator and a target promoter-EGFP fusion was performed at the Stanford High-Throughput Bioscience Center (HTBC; <http://med.stanford.edu/htbc.html>). Three strains were used for screening: MB1101 pMB958 (LdtR); RFF231 pMB949 (RpoH); and MB1102 pMB956 (VisNR). Starter cultures were grown ~24 hours to saturation in M9 sucrose Gm Sm, then diluted to an  $OD_{600} = 0.15$  in the same medium. Wells of Greiner 384-plates (polystyrene, black with clear bottom, tissue-culture treated [E&K Scientific #EK-30091]) were filled with: 40  $\mu$ L M9 sucrose Gm Sm with 0.625 mM IPTG (0.5 mM final concentration after adding cells); 40  $\mu$ L without IPTG (no inducer control); or 50  $\mu$ L without IPTG (growth medium blank). Test compounds, diluted in DMSO, were transferred (100 nL) by using a V&P Scientific pin tool on a Caliper Life Sciences Staccato SciClone ALH3000 small molecule liquid handling system, after which 10  $\mu$ L of 0.15  $OD_{600}$  cells were added to wells with 40  $\mu$ L growth medium. Plates were sealed with AeraSeal sterile adhesive microplate seals (Excel Scientific; Victorville, CA), lidded, and incubated at 30°C with shaking (250 rpm) for 17-19 hours. We used a Tecan Infinite M1000 Pro plate reader to read bottom fluorescence (emission=489 nm; excitation=507 nm) and absorbance (600 nm).

We screened a total of 10 compound libraries (Table S3) using the workflow shown in Fig. S3. Data were analyzed using MDL Assay Explorer software. All compounds in the Sigma LOPAC, Microsource Spectrum, Biomol ICCB and Biomol FDA libraries were screened at seven different concentrations (20, 10, 5, 2.5, 1.25, 0.625, 0.313  $\mu$ M or for Biomol ICCB, 10, 5, 2.5, 1.25, 0.625, 0.313 0.156  $\mu$ g/mL) (Table S3). Compounds in the NCIDTP library and NIH Clinical Collection

were screened at a single concentration in duplicate. Compounds in the ChemDiv, ChemBridge, and Specs libraries in the "Diverse" Collection (n=113,809) were screened at a single concentration, after which we devised a ranking system for rescreening the most promising compounds at multiple concentrations (Tables S4 and S5). 629 Diverse-Collection compounds were retested in duplicate, and at eight different concentrations (20, 10, 5, 2.5, 1.25, 0.625, 0.313 0.156  $\mu$ M).

**Testing purchased compounds.** Retesting compounds obtained from sources other than the screening libraries is an essential follow-up for any high-throughput compound screen, because library compounds may not match their given structure or calculated concentration; this might occur due to degradation or errors in dispensing by the library supplier. To evaluate selected results from the high-throughput screen, we purchased 10 compounds that showed inhibitory activity for one or more of the three CLas regulators: six of these were from the Known Bioactive Collection and four from the Diverse Collection (Fig. 2, Fig. S4). Compounds and suppliers were: 4'-Demethylepipodophyllotoxin (Abcam #ab142634, Cambridge, MA); Orbifloxacin (Abcam #ab143425); Rosiglitazone maleate (Abcam #ab142461); Fisetin (Abcam #ab142429); Oxybenzone (Sigma-Aldrich #59647); Bortezomib (Sigma-Aldrich #5043140001); #5109513 (ChemBridge); #8013-5939 (ChemDiv); #C549-0604 (ChemDiv); and #D244-0326 (ChemDiv). Structures of the four compounds purchased from ChemBridge and ChemDiv (diluted in DMSO) were confirmed by 1D proton NMR at the NMR Facility in the Stanford University Chemistry Department. Stanford NMR spectra for all compounds matched the spectra provided by the suppliers. The three ChemDiv compounds appeared >95% pure, while ChemBridge compound #5109513 had other aromatic resonances that integrated to about 15% relative to the correct peaks.

The 10 purchased compounds were also tested on each of the three *Sme* deletion strains ectopically expressing the corresponding *Sme* regulator (LdtR, RpoH or VisNR) (Table S2). Testing was similar to the above high-throughput screening method, except that: 96-well plates (E&K Scientific, #EK-25090) contained 100  $\mu$ L per well; compound solutions were pipetted into wells instead of being pinned; plates were shaken on a "Mix-EVR Invitroshaker" (Taitec; Koshigaya, Japan) at 1000 rpm for 18-19 hours; and top fluorescence and bottom absorbance were read with a Biotek Synergy H1 plate reader (emission=479 nm; excitation=520 nm). Each compound was tested twice at multiple concentrations.

Three candidate VisNR-inhibiting compounds (Bortezomib; ChemDiv #C549-0604; and ChemDiv #D244-0326) were assayed for effects on swim motility as before (15), except that 35x10 mm petri dishes were used (Falcon Corning #351008), each containing 4 mL swim agar medium (TY, 0.22% Bacto™agar, 50  $\mu$ g mL<sup>-1</sup>Gm, 500  $\mu$ g mL<sup>-1</sup> Sm, and 0.05 mM IPTG). One strain plus one treatment was assayed per plate. Each compound was tested at 20  $\mu$ M, using DMSO as a control, with replicates (n=4) of four plasmid-containing strains: CL150 pSRKGm (WT, empty vector); MB1102 pSRKGm ( $\Delta$ visNR, empty vector); MB1102 pMB877 ( $\Delta$ visNR, CLas

VisNR); and MB1102 pMB877 ( $\Delta visNR$ , *Sme* VisNR). In experiments using 0.5 mM IPTG, motility was enhanced compared to WT in strains ectopically expressing either CLas or *Sme* VisNR. Therefore, we lowered the IPTG concentration: using 0.05 mM IPTG, WT carrying the empty vector showed approximately the same motility as strains ectopically expressing VisNR. Swim colony diameters were measured at 4 days and statistical significance tested using a Student's T-test (one-tail distribution, two-samples, equal variance).

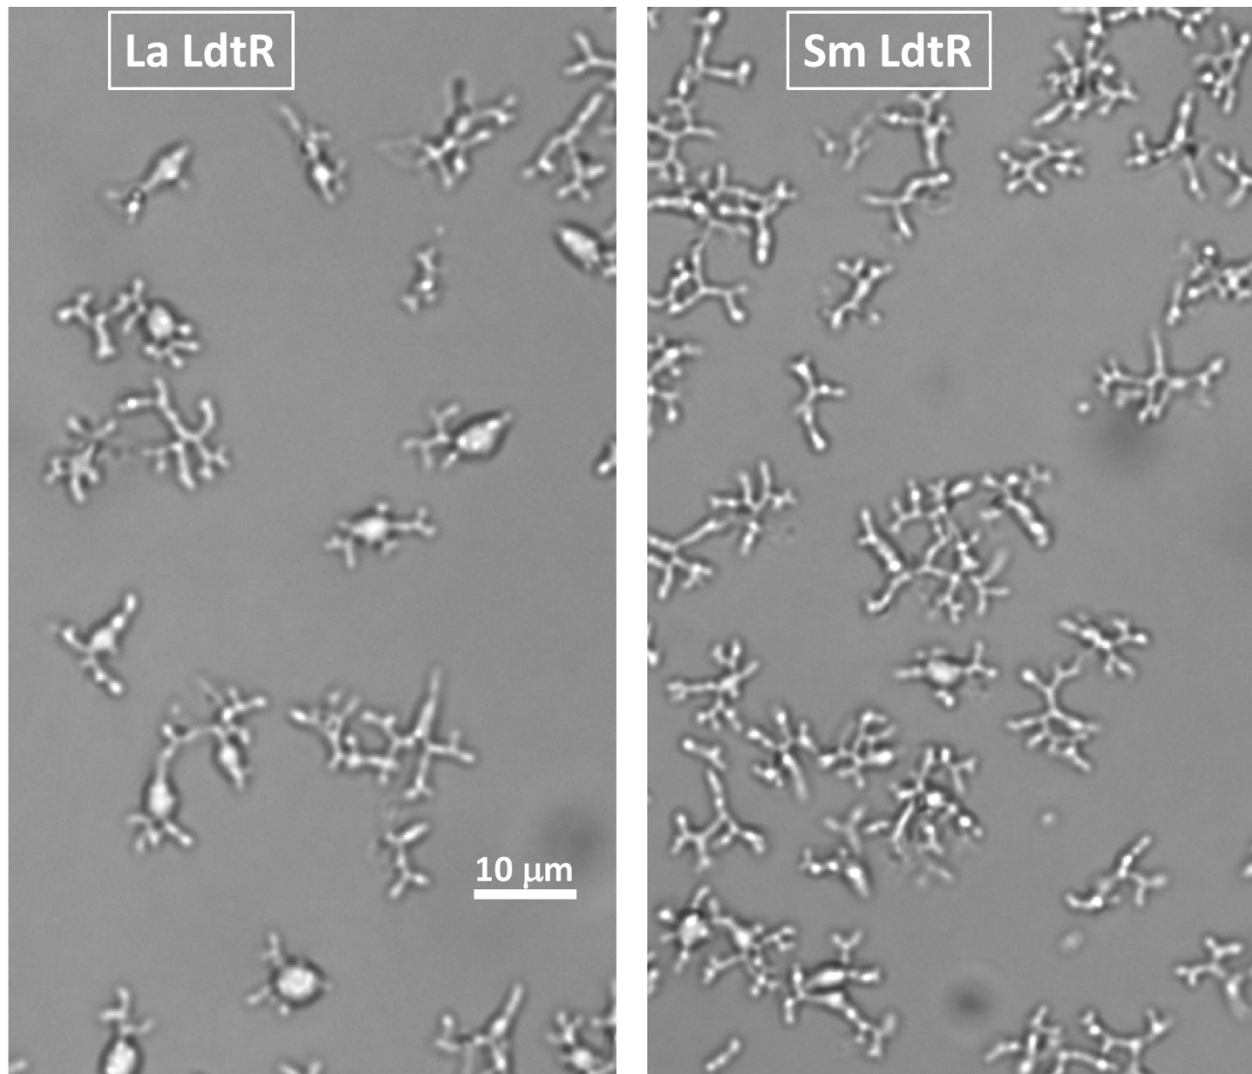

**Fig. S1.** *S. meliloti*  $\Delta$ *ldtR* strain (MB1101) ectopically expressing *Ca. L. asiaticus* LdtR on pMB878 (left) or *S. meliloti* LdtR on pMB961 (right). Wild type *S. meliloti* cells are rod-shaped and about 2 µm long (17). Cultures were grown in M9 sucrose with 0.5 mM IPTG for 19 hours to exponential phase and imaged on a Leica DM5000B microscope using a 40X objective.



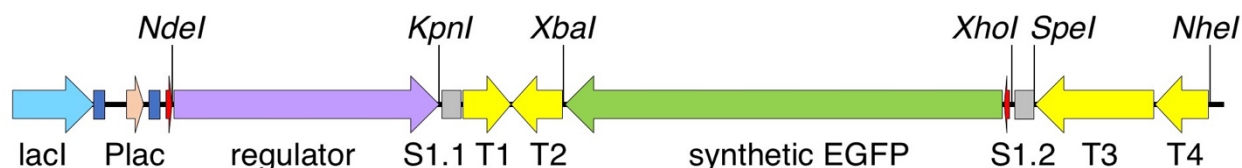

**Fig. S2.** Map of the modular transcription regulator–EGFP-expression cassette used in high-throughput compound screening. The cassette was cloned into pSRKGm (6) as described in Materials and Methods. The 3' end of *lacI* encoding the Lac repressor is shown in light blue, and its operator sequences, O3 (left) and O1, in dark blue. The *Ca. L. asiaticus* or *S. meliloti* transcription regulator gene (purple) is expressed from the *lac* operon promoter (pale orange) and RBS (red). A promoterless synthetic EGFP gene (green) with an optimal *S. meliloti* RBS (red) (11) can be expressed by replacing the synthetic transcriptionally silent random spacer (gray; S1.2 from Cambray et al. 2013 (12) with promoter DNA. A different random spacer is downstream of the regulator gene (gray, S1.1) (12). The EGFP ORF is flanked by transcription terminators (yellow) (12): T1, *rpoC*; T2, *rnpB*; T3, M13 central T linker + *rrnD* terminator 1; T4, *rrnB* terminator 1. KpnI, NdeI, NheI, SpeI, XbaI, XhoI restriction sites are unique.

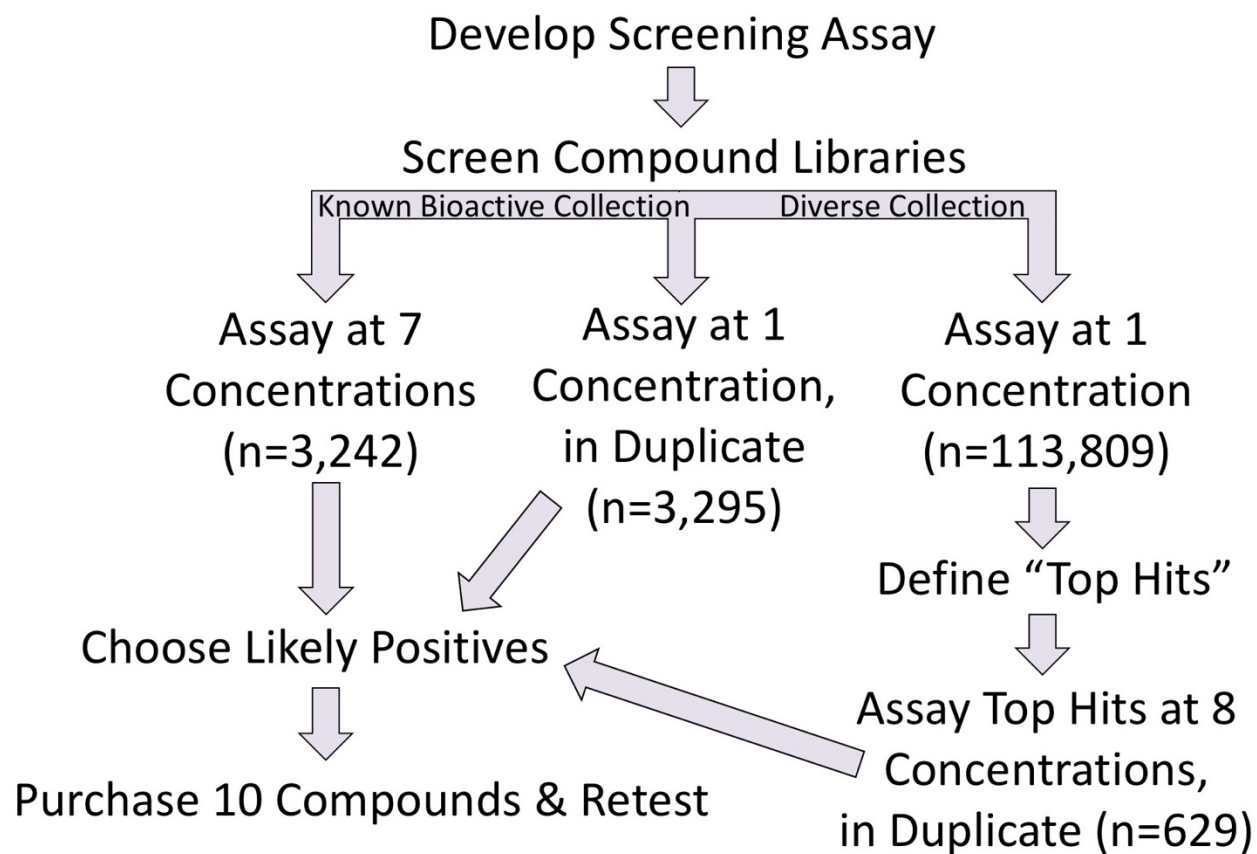

**Fig. S3.** Workflow for high-throughput compound screening. 120,346 compounds were screened; see Table S3 for libraries screened, compound concentrations, and number of compounds in each library.

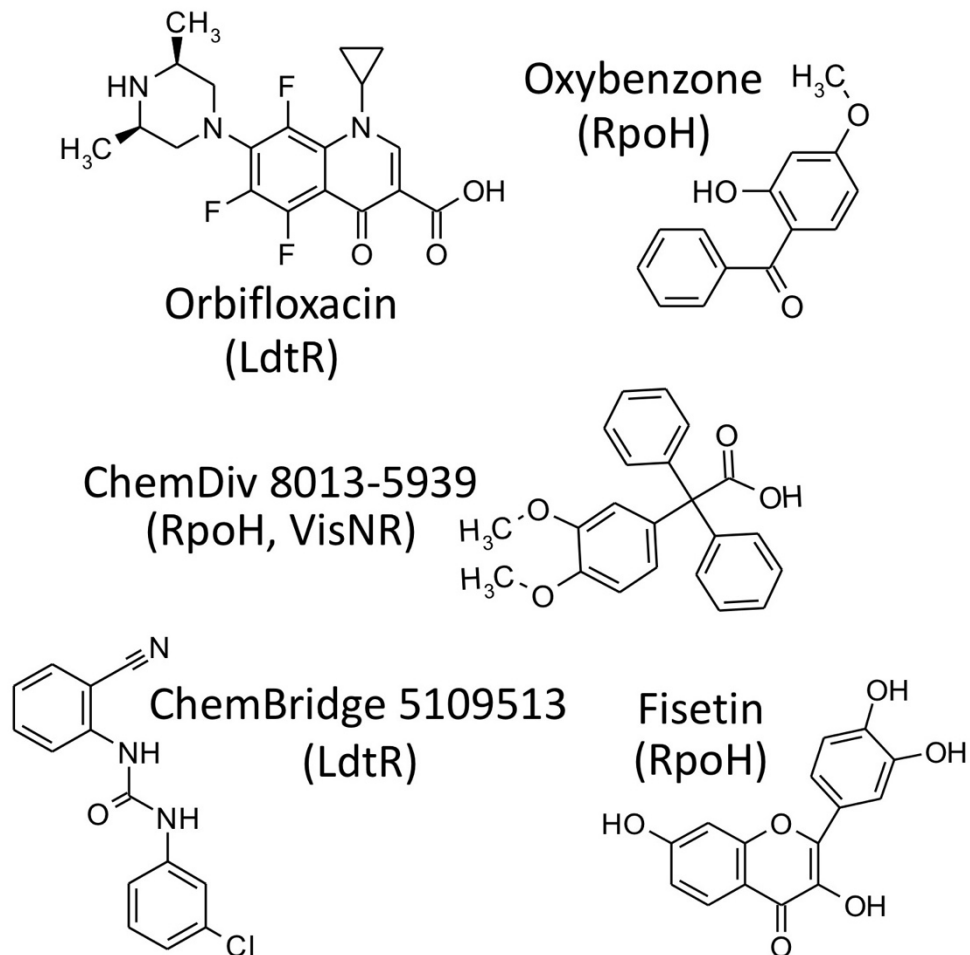

**Fig. S4.** Five compounds whose effects on the *Ca. L. asiaticus* and *S. meliloti* regulators (LdtR, RpoH/RpoH1, and VisNR) were not confirmed by retesting purchased compounds (Table S6). Regulator(s) identified via high-throughput screening as the putative target(s) of the inhibitory compound(s) are shown below the compound name (Bioactive Collection compounds) or supplier/catalog number (Diverse Collection compounds) in parentheses.

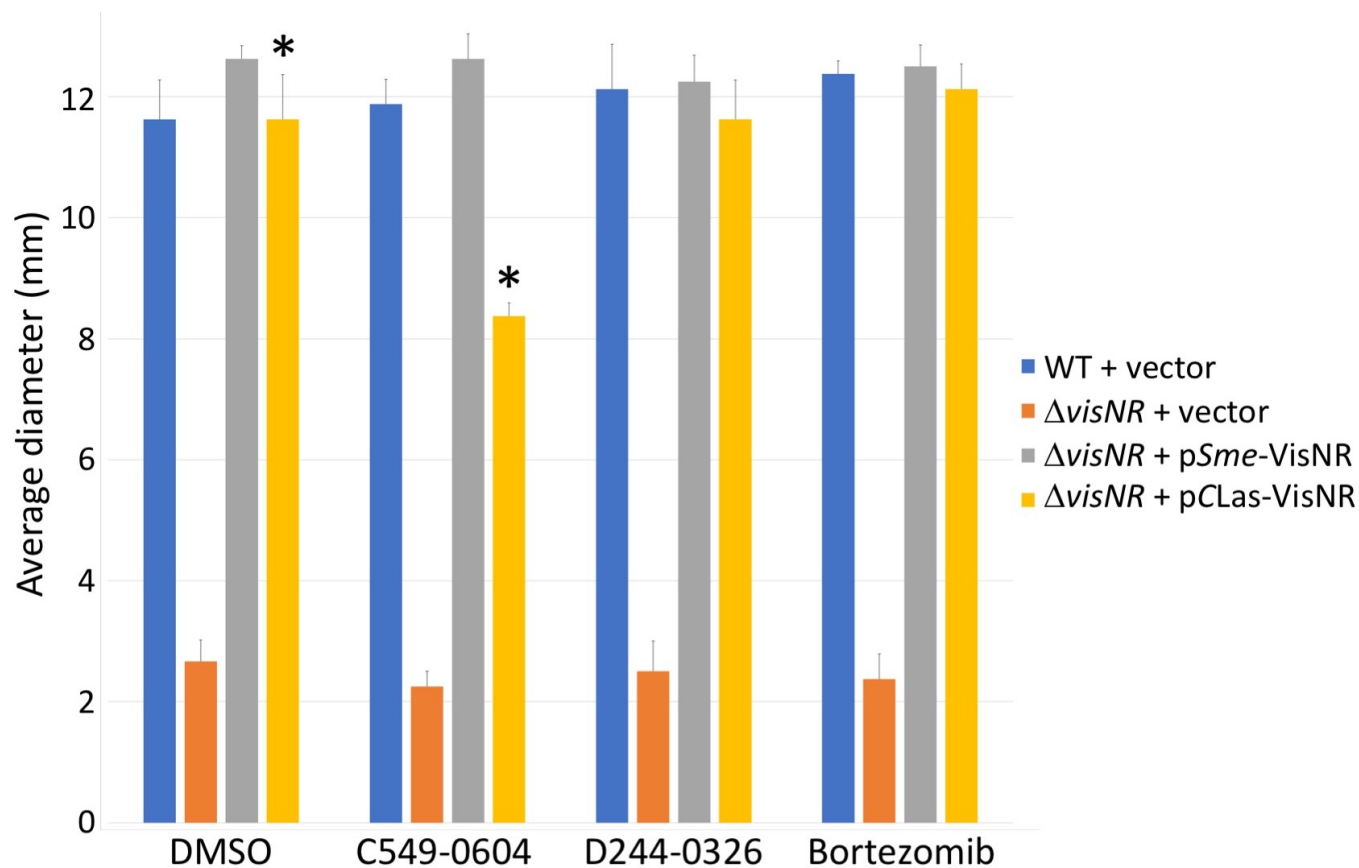

**Fig. S5.** Swim motility tests of three candidate VisNR-inhibiting compounds (ChemDiv #C549-0604; ChemDiv #D244-0326; and Bortezomib). Assays were performed as described in Supplementary Materials and Methods. Error bars show standard deviation for an average of four replicates. Each compound was tested at 20  $\mu$ M. Swim motility mediated by ectopically expressed CLas VisNR was significantly inhibited by 20  $\mu$ M ChemDiv #C549-0604 compared to DMSO controls (asterisks, P-value,  $1.7 \times 10^{-4}$ ), but not by Bortezomib or ChemDiv #D244-0326.

**Table S1.** *Ca. Liberibacter asiaticus* (CLAs) predicted transcription regulators, not listed in Table 1. Bioinformatic analyses predict up to 19 transcription regulators are encoded in the CLAs genome.

| CLAs regulator, GenBank accession <sup>1</sup> | <i>Sinorhizobium meliloti</i> ( <i>Sme</i> ) ortholog(s) <sup>2</sup> | Percent identity between CLAs and <i>Sme</i> proteins | Regulator type              | Putative function of regulator in <i>Sme</i> (reference) | CLAs fold change expression for plant vs. psyllid <sup>3</sup> |
|------------------------------------------------|-----------------------------------------------------------------------|-------------------------------------------------------|-----------------------------|----------------------------------------------------------|----------------------------------------------------------------|
| ACT56762                                       | RpoD                                                                  | 72, 41                                                | Sigma factor                | Essential, primary sigma factor (18)                     | Not reported                                                   |
| ACT57093                                       | RirA                                                                  | 63                                                    | IscR                        | Response to iron limitation (19)                         | 2.1                                                            |
| ACT56890                                       | PrbP (SMc03874)                                                       | 73                                                    | CarD                        | Unknown                                                  | 2.4                                                            |
| ACT57256                                       | MucR                                                                  | 55                                                    | Ros/MucR                    | Regulation of exopolysaccharide production (20)          | Not attempted                                                  |
| ACT56999                                       | Rem                                                                   | 70                                                    | Response regulator          | Regulation of motility (21)                              | Not reported                                                   |
| ACT57389                                       | TacA                                                                  | 34                                                    | Enhancer binding protein    | Possible involvement in polar development (22)           | Not reported                                                   |
| ACT57691                                       | None                                                                  | n/a                                                   | HTH-XRE                     | n/a                                                      | Not reported                                                   |
| ACT57365                                       | SMc00653                                                              | 47                                                    | Response regulator          | Unknown                                                  | 7.9                                                            |
| ACT56949                                       | DivK                                                                  | 78                                                    | Response regulator          | Cell cycle control; essential gene (23)                  | 2.1                                                            |
| ACT56904                                       | GcrA (SMc02139)                                                       | 45                                                    | GcrA                        | Cell cycle control; likely essential gene (24)           | Not reported                                                   |
| ACT56785                                       | CpdR1, CdpR2                                                          | 87, 43                                                | Response regulator          | Cell cycle control; essential for symbiosis (25)         | 3.0                                                            |
| ACT56917                                       | SMc02223                                                              | 50                                                    | LexA-like C-terminal domain | Unknown                                                  | Not attempted                                                  |

<sup>1</sup>Regulator accession numbers are for the '*Candidatus Liberibacter asiaticus*' Psy62 genome (1).

<sup>2</sup>If the gene name has not been annotated in GenBank, the *S. meliloti* 1021 unique locus tag is given in parentheses.

<sup>3</sup>Data published in Yan *et al.* 2013 (26). The fold change provided here was calculated from their reported log<sub>2</sub> ratio values.

Not reported = the gene was listed in Yan *et al.* Supplementary Table 1 as "selected for qRT-PCR analysis" but a log<sub>2</sub> ratio was not reported. Not attempted = the gene was not listed in Yan *et al.* Supplementary Table 1.

**Table S2.** Strains and plasmids used in this study.

| Strain or plasmid                            | Description <sup>1</sup>                                                                    | Reference  |
|----------------------------------------------|---------------------------------------------------------------------------------------------|------------|
| <b><i>Sinorhizobium meliloti</i> strains</b> |                                                                                             |            |
| CL150                                        | Rm1021, <i>ecfR1</i> , <i>pstC</i> corrected; Sm <sup>r</sup>                               | (4)        |
| RFF231                                       | CL150, $\Delta$ <i>rpoH1 rpoH2</i> ; Sm <sup>r</sup>                                        | (27)       |
| MB1101                                       | CL150, $\Delta$ <i>ldtR</i> ; Sm <sup>r</sup>                                               | This study |
| MB1102                                       | CL150, $\Delta$ <i>visNR</i> ; Sm <sup>r</sup>                                              | This study |
| MB1105                                       | CL150, $\Delta$ <i>lsrB</i> ; Sm <sup>r</sup>                                               | This study |
| MB1122 pMB913                                | CL150, $\Delta$ <i>ctrA</i> ; pSRKGm with <i>Sme ctrA</i> ; Gm <sup>r</sup> Sm <sup>r</sup> | This study |
| MB1138                                       | CL150; $\Delta$ <i>phrR2</i> ; Sm <sup>r</sup>                                              | This study |
| MB1139                                       | CL150; $\Delta$ <i>phrR1</i> ; Sm <sup>r</sup>                                              | This study |
| MB1142                                       | CL150; $\Delta$ <i>phrR1 phrR2</i> ; Sm <sup>r</sup>                                        | This study |
| <b>Plasmids</b>                              |                                                                                             |            |
| pSRKGm                                       | Broad-host-range <i>Plac</i> expression vector; Gm <sup>r</sup>                             | (6)        |
| pMB861                                       | pSRKGm; optimized CLas <i>rpoH</i> ; Gm <sup>r</sup>                                        | This study |
| pMB865                                       | pSRKGm; <i>Sme rpoH1</i> ; Gm <sup>r</sup>                                                  | This study |
| pMB874                                       | pSRKGm; optimized CLas <i>lsrB</i> ; Gm <sup>r</sup>                                        | This study |
| pMB875                                       | pSRKGm; optimized CLas <i>phrR</i> ; Gm <sup>r</sup>                                        | This study |
| pMB876                                       | pSRKGm; optimized CLas <i>ctrA</i> ; Gm <sup>r</sup>                                        | This study |
| pMB877                                       | pSRKGm; optimized CLas <i>visNR</i> ; Gm <sup>r</sup>                                       | This study |
| pMB878                                       | pSRKGm; optimized CLas <i>ldtR</i> ; Gm <sup>r</sup>                                        | This study |
| pMB876                                       | pSRKGm; optimized CLas <i>ctrA</i> ; Gm <sup>r</sup>                                        | This study |
| pMB913                                       | pSRKGm; <i>Sme ctrA</i> ; Gm <sup>r</sup>                                                   | This study |
| pMB949                                       | pSRKGm; optimized CLas <i>rpoH</i> ; <i>PibpA</i> ; EGFP; Gm <sup>r</sup>                   | This study |
| pMB950                                       | pSRKGm; optimized CLas <i>rpoH</i> ; <i>PgroES5</i> ; EGFP; Gm <sup>r</sup>                 | This study |
| pMB951                                       | pSRKGm; optimized CLas <i>lsrB</i> ; <i>Psmc01834</i> ; EGFP; Gm <sup>r</sup>               | This study |
| pMB952                                       | pSRKGm; optimized CLas <i>lsrB</i> ; <i>Plrp3</i> ; EGFP; Gm <sup>r</sup>                   | This study |
| pMB953                                       | pSRKGm; optimized CLas <i>phrR</i> ; <i>PldtR</i> ; EGFP; Gm <sup>r</sup>                   | This study |
| pMB954                                       | pSRKGm; optimized CLas <i>phrR</i> ; <i>Psmc00404</i> ; EGFP; Gm <sup>r</sup>               | This study |
| pMB955                                       | pSRKGm; optimized CLas <i>ctrA</i> ; <i>PminC</i> ; EGFP; Gm <sup>r</sup>                   | This study |
| pMB956                                       | pSRKGm; optimized CLas <i>visNR</i> ; <i>Prem</i> ; EGFP; Gm <sup>r</sup>                   | This study |
| pMB957                                       | pSRKGm; optimized CLas <i>ldtR</i> ; <i>PtacA</i> ; EGFP; Gm <sup>r</sup>                   | This study |
| pMB958                                       | pSRKGm; optimized CLas <i>ldtR</i> ; <i>Psmc04059</i> ; EGFP; Gm <sup>r</sup>               | This study |
| pMB959                                       | pSRKGm; optimized CLas <i>ldtR</i> ; <i>PldtP</i> ; EGFP; Gm <sup>r</sup>                   | This study |
| pMB961                                       | pSRKGm; <i>Sme ldtR</i> ; Gm <sup>r</sup>                                                   | This study |
| pMB962                                       | pSRKGm; <i>Sme ldtR</i> ; <i>Psmc04059</i> ; EGFP; Gm <sup>r</sup>                          | This study |
| pMB973                                       | pSRKGm; <i>Sme rpoH1</i> ; <i>PibpA</i> ; EGFP; Gm <sup>r</sup>                             | This study |
| pMB974                                       | pSRKGm; <i>Sme visNR</i> ; <i>Prem</i> ; EGFP; Gm <sup>r</sup>                              | This study |
| pMB975                                       | pSRKGm; <i>Sme visNR</i> ; Gm <sup>r</sup>                                                  | This study |

<sup>1</sup>CLas, *Ca. Liberibacter asiaticus*; *Sme*, *Sinorhizobium meliloti*.

**Table S3.** Compound libraries screened at the Stanford High-Throughput Biosciences Center.

| <b>Library description or vendor</b>                              | <b>Number of unique compounds<sup>1</sup></b> | <b>Compound concentration(s)</b>                  |
|-------------------------------------------------------------------|-----------------------------------------------|---------------------------------------------------|
| <b><i>Diverse Collection</i></b>                                  |                                               |                                                   |
| Specs                                                             | 30,106                                        | 10 $\mu$ M                                        |
| ChemBridge                                                        | 23,759                                        | 4 $\mu$ g/ml                                      |
| ChemDiv                                                           | 49,946                                        | 10 $\mu$ M                                        |
| ChemDiv, Kinase-targeted                                          | 9,998                                         | 20 $\mu$ M                                        |
| <b><i>Known-Bioactive Collection</i></b>                          |                                               |                                                   |
| Sigma LOPAC                                                       | 1,269                                         | 20, 10, 5, 2.5, 1.25, 0.625, 0.3125 $\mu$ M       |
| NIH Clinical Collection                                           | 377                                           | 10 $\mu$ M, in duplicate                          |
| NCIDTP, Challenge, Natural Product, and Structural Diversity Sets | 2,196                                         | 20 $\mu$ M, in duplicate                          |
| NCIDTP, Mechanistic Diversity Set                                 | 722                                           | 2 $\mu$ M, in duplicate                           |
| Microsource Spectrum                                              | 1,502                                         | 20, 10, 5, 2.5, 1.25, 0.625, 0.3125 $\mu$ M       |
| Biomol ICCB                                                       | 296                                           | 10, 5, 2.5, 1.25, 0.625, 0.3125, 0.156 $\mu$ g/ml |
| Biomol FDA                                                        | 175                                           | 20, 10, 5, 2.5, 1.25, 0.625, 0.3125 $\mu$ M       |

<sup>1</sup>There is slight compound redundancy among the libraries, particularly in the Known-Bioactive Collection. Additional information about the libraries is available at: <http://med.stanford.edu/htbc/compounds.html>

**Table S4.** Criteria for ranking single concentration results obtained from screening the Diverse Collection libraries.

| <b>Rank<sup>1</sup></b> | <b>% EGFP<sup>2</sup><br/>Inhibition</b> | <b>Difference<br/>(%EGFP - %ABS<sup>3</sup> Inhibition)</b> |
|-------------------------|------------------------------------------|-------------------------------------------------------------|
| 1                       | > 40%                                    | > 30%                                                       |
| 2                       | > 40%                                    | > 20%                                                       |
| 2                       | > 30%                                    | > 30%                                                       |
| 3                       | > 40%                                    | > 10%                                                       |
| 3                       | > 30%                                    | > 20%                                                       |
| 4                       | > 30%                                    | > 10%                                                       |
| 4                       | > 20%                                    | > 20%                                                       |

<sup>1</sup>To choose compounds for retesting at multiple concentrations, the single concentration results for all three regulators (LdtR, RpoH, VisNR) were ranked from best to worst for their ability to inhibit EGFP fluorescence without significantly inhibiting growth. For example, each compound in Rank 1 showed both high EGFP inhibition and a large differential between % inhibition of EGFP fluorescence and % inhibition of growth.

<sup>2</sup>EGFP = fluorescence, indicative of inhibition of *Ca. L. asiaticus* regulator activity.

<sup>3</sup>ABS = absorbance, indicative of *S. meliloti* growth.



**Table S5.** Distribution by rank and *Ca. L. asiaticus* regulator of 629 Diverse-collection compounds chosen for retesting.

| <b>Selectivity<sup>1</sup></b> | <b>Rank 1</b> | <b>Rank 2</b> | <b>Rank 3</b> | <b>Rank 4</b> |
|--------------------------------|---------------|---------------|---------------|---------------|
| LdtR                           | 80            | 118           | 0             | 0             |
| RpoH                           | 1             | 55            | 41            | 9             |
| VisNR                          | 43            | 24            | 25            | 17            |
| LdtR, RpoH                     | 7             | 11            | 0             | 0             |
| LdtR, VisNR                    | 14            | 14            | 0             | 0             |
| RpoH, VisNR                    | 26            | 31            | 0             | 0             |
| LdtR, RpoH, VisNR              | 46            | 67            | 0             | 0             |

<sup>1</sup>Selectivity denotes which *Ca. L. asiaticus* regulator(s) met the rank criteria (defined in Table S4) for single concentration compound results.

**Table S6.** Retesting summary for 10 purchased compounds.

| Compound                      | High-throughput screening |                            | Retesting purchased compounds                          |                             |                       |                             |                            |
|-------------------------------|---------------------------|----------------------------|--------------------------------------------------------|-----------------------------|-----------------------|-----------------------------|----------------------------|
|                               | Selectivity <sup>1</sup>  | IC50 <sup>2</sup> -EGFP    | Selectivity                                            | CLas regulator              |                       | Sme regulator               |                            |
|                               |                           |                            |                                                        | IC50-EGFP                   | IC50-ABS <sup>3</sup> | IC50-EGFP                   | IC50-ABS                   |
| 4'-Demethylepipodophyllotoxin | LdtR                      | 10.3                       | LdtR                                                   | 7.5                         | >>20                  | 8.7                         | >>20                       |
| Bortezomib                    | VisNR                     | 20.2                       | VisNR<br>RpoH ( <i>Sme</i> )                           | 2.1 (VisNR)                 | >40 (VisNR)           | 2.4 (VisNR)<br><1.25 (RpoH) | >40 (VisNR)<br>13.0 (RpoH) |
| ChemDiv C549-0604             | VisNR                     | 2.6                        | VisNR                                                  | 0.7                         | >>20                  | >20                         | >>20                       |
| ChemDiv D244-0326             | VisNR                     | 8.5                        | VisNR<br>RpoH                                          | 5.3 (VisNR),<br>26.8 (RpoH) | >>20                  | 18.5 (VisNR)<br>20.0 (RpoH) | >>20                       |
| Rosiglitazone maleate         | RpoH                      | 27.0                       | VisNR<br>RpoH                                          | 15.7 (VisNR)<br>24.4 (RpoH) | >40                   | 9.4 (VisNR)<br>3.5 (RpoH)   | >40                        |
| ChemBridge 5109513            | LdtR                      | 4.8                        | Non-selective. Toxic <sup>4</sup> , all strains        |                             |                       |                             |                            |
| ChemDiv 8013-5939             | RpoH<br>VisNR             | 11.2 (RpoH)<br>4.2 (VisNR) | Inactive <sup>5</sup>                                  |                             |                       |                             |                            |
| Fisetin                       | RpoH                      | 19.1                       | Non-selective. Toxic, CLas and <i>Sme</i> RpoH strains |                             |                       |                             |                            |
| Orbifloxacin                  | LdtR                      | <0.3125                    | Non-selective. Toxic, all strains                      |                             |                       |                             |                            |
| Oxybenzone                    | RpoH                      | 10.1                       | Non-selective. Toxic, all strains except CLas LdtR     |                             |                       |                             |                            |

<sup>1</sup>Selectivity indicates which regulator strains showed inhibition of EGFP fluorescence (cutoff  $\geq 30\%$  inhibition). Non-selective: compound inhibited EGFP fluorescence because it affected growth. CLas, *Ca. Liberibacter asiaticus*. *Sme*, *Sinorhizobium meliloti*.

<sup>2</sup>IC50 is the micromolar concentration of an inhibitor where the response was reduced by half. IC50 values for inhibition are shown for only those compounds that specifically inhibited EGFP fluorescence of just one or two of the three regulators.

<sup>3</sup>ABS, absorbance. >, ABS inhibition at the highest concentration tested was  $\geq 30\%$  and  $< 50\%$ . >>, ABS inhibition at highest concentration tested  $< 30\%$ .

<sup>4</sup>Toxic,  $\geq 50\%$  ABS inhibition at the highest concentration tested.

<sup>5</sup>Inactive, no EGFP or ABS inhibition.

| <b>Table S7. Oligonucleotide primers used in this study</b>                 |                                |                                |
|-----------------------------------------------------------------------------|--------------------------------|--------------------------------|
| <b>Description</b>                                                          | <b>Primer 1</b>                | <b>Primer 2</b>                |
| <b>Construct plasmids carrying <i>Sinorhizobium meliloti</i> regulators</b> |                                |                                |
| Amplify <i>S. meliloti rpoH1</i> as NdeI-KpnI DNA to create pMB865          | TTCATATGGCCCGCAATACCTTGCCG     | CAGGTACCTTAAGCGCCTTCAACCACGCG  |
| Amplify <i>S. meliloti ctrA</i> as NdeI-KpnI DNA to create pMB913           | TTCATATGCGGGTTCTACTGATCGA      | CAGGTACCTCAGGCGGTTTCCAGGTAGT   |
| Amplify <i>S. meliloti ldtR</i> as NdeI-KpnI DNA to create pMB961           | TACATATGAACACCAAGATGAAGCC      | CAGGTACCTAAACCCGCCCGATTAGAG    |
| Amplify <i>S. meliloti visNR</i> as NdeI-KpnI DNA to create pMB975          | AACATATGGAAATGTCGCGGTGCG       | CAGGTACCCTAGCTGATATAGCCGAG     |
| <b>Construct genomic deletions of <i>S. meliloti</i> regulators</b>         |                                |                                |
| Amplify DNA upstream of <i>visNR</i> as XbaI-NotI to create pMB891          | AATCTAGAAGCTGGGCTTCGGCGACAG    | AAGCGGCCGCGTATTCTTGCCACCAAGCGA |
| Amplify DNA downstream of <i>visNR</i> as NotI-XhoI to create pMB891        | AAGCGGCCGCGACGAACTTCGATTCTGCCA | AACTCGAGAGGCTCGATACGGCAACGGA   |
| Amplify DNA upstream of <i>lsrB</i> as XbaI-NotI to create pMB887           | AATCTAGATTACGGCGCTTTCTCCGTG    | AATCTAGATTACGGCGCTTTCTCCGTG    |
| Amplify DNA downstream of <i>lsrB</i> as NotI-XhoI to create pMB887         | AAGCGGCCGCCGATCCGTTCAATTGCCCGA | AACTCGAGGATTGACGAGGTAGGTCTTC   |
| Amplify DNA upstream of <i>phrR1</i> as XbaI-NotI to create pMB892          | AATCTAGAATGCCGTTGATGATGCAGTC   | AAGCGGCCGCTTGATGGCGAAATCCACTAT |
| Amplify DNA downstream of <i>phrR1</i> as NotI-XhoI to create pMB892        | AAGCGGCCGCAAGTCGTCCGGCACGAAAGA | AACTCGAGGCCGATCGCTAGGAAAGCT    |
| Amplify DNA upstream of <i>phrR2</i> as XbaI-NotI to create pMB889          | AATCTAGACGACATGCTCGCCCGAAATCA  | AAGCGGCCGCTAAGTTTGCTTGAATGGACG |
| Amplify DNA downstream of <i>phrR2</i> as NotI-ApaI to create pMB889        | AAGCGGCCGCTGTCCGTGACGACGATTGGC | AAGGGCCCCATGTGAGGATCGGCTTGA    |
| Amplify DNA upstream of <i>ctrA</i> as XbaI-NotI to create pMB890           | AATCTAGAAGATCATGCTGCAGCTGCCG   | AAGCGGCCGCGCCCAAGGTTGTCGTGGCAT |
| Amplify DNA downstream of <i>ctrA</i> as NotI-ApaI to create pMB890         | AAGCGGCCGCCCGCATTCCCGTAGGCGAC  | AAGGGCCCCAAGCTGGTGGAGCTCATC    |
| Amplify DNA upstream of <i>ldtR</i> as XbaI-NotI to create pMB888           | AATCTAGATAGGTCTTCTTGTCGCCCTT   | AAGCGGCCGCTCGTGCCTCACTGTTTCGTT |
| Amplify DNA downstream of <i>ldtR</i> as NotI-XhoI to create pMB888         | AAGCGGCCGCTCGGGGCGGGTTTACCTTCA | GGTTTGTCTCGAGCTGGGCGA          |
| Check genomic <i>ldtR</i> deletion (strain=MB1101)                          | ACATCGAGTGCCGCATCGCG           | AGGTCGCCCGACATCGACTG           |
| Check genomic <i>visNR</i> deletion (strain=MB1102)                         | AATCTAGAATGGATTTCTGTTGAGACACA  | CAAACATGGCCGAGGCGCTG           |
| Check genomic <i>ctrA</i> deletion (strain=MB1122)                          | AGATCATGCTGCAGCTGCCG           | GGAGTTCGACGCGATATTCA           |
| Check genomic <i>phrR1</i> deletion (strain=MB1139)                         | CTTGCGCTCGGCTTCGGCAT           | CAGATCGACATAGATCGACA           |
| Check genomic <i>phrR2</i> deletion (strain=MB1138)                         | CATCGAAACGACATCGGAGC           | GCTCGCGCTGAAGCCGGCTG           |
| Check genomic <i>lsrB</i> deletion (strain=MB1105)                          | GATCCGTCCGCACCAAGAGC           | GCGATCTCCGCCGTTTCGAG           |

|                                                                          |                               |                               |
|--------------------------------------------------------------------------|-------------------------------|-------------------------------|
|                                                                          |                               |                               |
| <b>Clone promoters into EGFP expression vector</b>                       |                               |                               |
| Amplify <i>ibpA</i> promoter to clone as SpeI-XhoI                       | ATACTAGTCCAGAAGGAACATGCAAGT   | AACTCGAGATAAGAGCAACGGTTGCGA   |
| Amplify <i>rem</i> promoter to clone as SpeI-XhoI                        | ATACTAGTGCAGACAATGCGGACAGATT  | AACTCGAGTCCGAATCAGTATGGATGCC  |
| Amplify <i>SMc04059</i> promoter to clone as SpeI-XhoI                   | ATACTAGTCACGTATGTCCCCTTCTG    | AACTCGAGATCGGCCTATGGTTGATCGT  |
| Amplify <i>groES5</i> promoter to clone as SpeI-XhoI                     | ATACTAGTTGCTTCATCTCCGTTACAT   | AACTCGAGTTGATGATCTTGTTCCTCA   |
| Amplify <i>SMc01384</i> promoter to clone as SpeI-XhoI                   | ATACTAGTTGCCAGCAATATCATCAAGGC | AACTCGAGCAGTCTTGGGAGGACAGGC   |
| Amplify <i>Irp3</i> promoter to clone as SpeI-XhoI                       | ATACTAGTATTTGCATCGGTTTTGACCC  | AACTCGAGTTTATCCGCCGATCAACTGC  |
| Amplify <i>IdtR</i> promoter to clone as SpeI-XhoI                       | ATACTAGTGTTGCTGATCGTGCTCCAC   | AACTCGAGTGCCTCACTGTTTCGTTTGG  |
| Amplify <i>SMc00404</i> promoter to clone as SpeI-XhoI                   | ATACTAGTACTTCGCCATTTCCACAACC  | AACTCGAGGTTCCCTTTGTTGATCGAGCT |
| Amplify <i>minC</i> promoter to clone as SpeI-XhoI                       | ATACTAGTAAAGGAGAGAGGAACCGACA  | AACTCGAGCTTCGTTAATTATTGGTTGCC |
| Amplify <i>tacA</i> promoter to clone as SpeI-XhoI                       | ATACTAGTTTAAACCCTGAAGCGAGGCAA | AACTCGAGGACACGCGGGGTACTTTTG   |
| Amplify <i>IdtP</i> promoter to clone as SpeI-XhoI                       | ATACTAGTCCGACCTTTGCTGCTTTTC   | AACTCGAGCGTCTCAATGCGCCAGAAG   |
| Check promoters cloned as SpeI-XhoI (in <i>rrnB</i> terminator and EGFP) | TGAACACTCTCCGACTAG            | TTAAGGGTGAGCTTGCCGTA          |

**Additional Data Set S1 (separate file)**

Affymetrix GeneChip transcriptome data for expression of transcription regulators in *Sinorhizobium meliloti* regulator deletion strains.

**Additional Data Set S2 (separate file)**

Candidate inhibiting compounds identified by high-throughput screening of the Known Bioactive Collection.

**Additional Data Set S3 (separate file)**

Candidate inhibiting compounds identified by high-throughput screening of the Diverse Collection.

## References

1. Duan Y, *et al.* (2009) Complete genome sequence of citrus huanglongbing bacterium, '*Candidatus Liberibacter asiaticus*' obtained through metagenomics. *Mol Plant Microbe Interact* 22:1011-1020.
2. Tyler HL, Roesch LF, Gowda S, Dawson WO, & Triplett EW (2009) Confirmation of the sequence of '*Candidatus Liberibacter asiaticus*' and assessment of microbial diversity in Huanglongbing-infected citrus phloem using a metagenomic approach. *Mol Plant Microbe Interact* 22:1624-1634.
3. Galibert F, *et al.* (2001) The composite genome of the legume symbiont *Sinorhizobium meliloti*. *Science* 293:668-672.
4. Schlüter JP, *et al.* (2013) Global mapping of transcription start sites and promoter motifs in the symbiotic alpha-proteobacterium *Sinorhizobium meliloti* 1021. *BMC Genomics* 14:156.
5. Barnett MJ & Long SR (2015) The *Sinorhizobium meliloti* SyrM regulon: effects on global gene expression are mediated by *syrA* and *nodD3*. *J Bacteriol* 197:1792-1806.
6. Khan SR, Gaines J, Roop II RM, & Farrand SK (2008) Broad-host-range expression vectors with tightly regulated promoters and their use to examine the influence of TraR and TraM expression on Ti plasmid quorum sensing. *Appl Environ Microbiol* 74:5053-5062.
7. Grote A, *et al.* (2005) JCat: a novel tool to adapt codon usage of a target gene to its potential expression host. *Nucleic Acids Res* 33:W526-W531.
8. Quandt J & Hynes MF (1993) Versatile suicide vectors which allow direct selection for gene replacement in Gram-negative bacteria. *Gene* 127:15-21.
9. Pini F, *et al.* (2015) Cell cycle control by the master regulator CtrA in *Sinorhizobium meliloti*. *PLoS Genet* 11:e1005232.
10. Puigbo P, Guzman E, Romeu A, & Garcia-Vallve S (2007) OPTIMIZER: a web server for optimizing the codon usage of DNA sequences. *Nucleic Acids Res* 35:W126-131.
11. Schroeder BK, *et al.* (2005) Development of a functional genomics platform for *Sinorhizobium meliloti*: construction of an ORFeome. *Appl Environ Microbiol* 71:5858-5864.
12. Cambray G, *et al.* (2013) Measurement and modeling of intrinsic transcription terminators. *Nucleic Acids Res* 41:5139-5148.
13. Gautheret D & Lambert A (2001) Direct RNA motif definition and identification from multiple sequence alignments using secondary structure profiles. *J Mol Biol* 313:1003-1011.
14. Macke TJ, *et al.* (2001) RNAMotif, an RNA secondary structure definition and search algorithm. *Nucleic Acids Res* 29:4724-4735.
15. Barnett MJ & Long SR (2018) Novel genes and regulators that influence production of cell surface exopolysaccharides in *Sinorhizobium meliloti*. *J Bacteriol* 200:e00501-517.
16. Barnett MJ, Toman CJ, Fisher RF, & Long SR (2004) A dual-genome Symbiosis Chip for coordinate study of signal exchange and development in a prokaryote-host interaction. *Proc Natl Acad Sci USA* 101:16636-16641.

17. Cheng J, Sibley CD, Zaheer R, & Finan TM (2007) A *Sinorhizobium meliloti minE* mutant has an altered morphology and exhibits defects in legume symbiosis. *Microbiology* 153:375-387.
18. MacLellan SR, MacLean AM, & Finan TM (2006) Promoter prediction in the rhizobia. *Microbiology* 152:1751-1763.
19. Chao TC, Buhrmester J, Hansmeier N, Pühler A, & Weidner S (2005) Role of the regulatory gene *rirA* in the transcriptional response of *Sinorhizobium meliloti* to iron limitation. *Appl Environ Microbiol* 71:5969-5982.
20. Keller M, *et al.* (1995) Molecular analysis of the *Rhizobium meliloti mucR* gene regulating the biosynthesis of the exopolysaccharides succinoglycan and galactoglucan. *Mol Plant Microbe Interact* 8:267-277.
21. Rotter C, Mühlbacher S, Salamon D, Schmitt R, & Scharf B (2006) Rem, a new transcriptional activator of motility and chemotaxis in *Sinorhizobium meliloti*. *J Bacteriol* 188:6932-6942.
22. Fields AT, *et al.* (2012) The conserved polarity factor PodJ1 impacts multiple cell envelope-associated functions in *Sinorhizobium meliloti*. *Mol Microbiol* 84:892-920.
23. Lam H, Matroule JY, & Jacobs-Wagner C (2003) The asymmetric spatial distribution of bacterial signal transduction proteins coordinates cell cycle events. *Dev Cell* 5:149-159.
24. Greif D, *et al.* (2010) Space- and time-resolved protein dynamics in single bacterial cells observed on a chip. *J Biotechnol* 149:280-288.
25. Kobayashi H, De Nisco NJ, Chien P, Simmons LA, & Walker GC (2009) *Sinorhizobium meliloti* CpdR1 is critical for co-ordinating cell cycle progression and the symbiotic chronic infection. *Mol Microbiol* 73:586-600.
26. Yan Q, *et al.* (2013) Global gene expression changes in *Candidatus Liberibacter asiaticus* during the transmission in distinct hosts between plant and insect. *Mol Plant Pathol* 14:391-404.
27. Lang C, *et al.* (2018) Most *Sinorhizobium meliloti* extracytoplasmic function sigma factors control accessory functions. *mSphere* 3:e00454-18.
